# Supplementary material for: A Conserved Rule for Pancreatic Islet Organization
Source: PLOS journal article supplement (doi:10.1371/journal.pone.0110384), 2014-10-28
Supplement: S6 (10.1371/journal.pone.0110384.s006) [file journal.pone.0110384.s006.pdf › journal.pone.0110384.s006.pdf]

**Table S1.** Cellular attractions at high thermal fluctuations

| Species | n  | $J_{\beta\beta}$ | $J_{\alpha\beta}$ | $J_{\alpha\beta}/J_{\beta\beta}$ |
|---------|----|------------------|-------------------|----------------------------------|
| Mouse   | 30 | $0.96 \pm 0.08$  | $0.72 \pm 0.08^a$ | $0.75 \pm 0.06$                  |
| Pig     | 30 | $0.78 \pm 0.09$  | $0.69 \pm 0.07^a$ | $0.88 \pm 0.04^b$                |
| Human1  | 30 | $0.80 \pm 0.07$  | $0.74 \pm 0.04^a$ | $0.93 \pm 0.06^c$                |
| Human2  | 30 | $0.91 \pm 0.05$  | $0.89 \pm 0.06^a$ | $0.97 \pm 0.05^d$                |

Relative attractions between cell types are inferred from three-dimensional islet structures, mean  $\pm$  SD (n=30 islets). Note that the attraction between  $\alpha$  cells is defined as a reference attraction,  $J_{\alpha\alpha} = 1$ . Here thermal fluctuation energy is  $T = 0.5$ . <sup>a</sup>Paired Student's t-test concludes  $J_{\beta\beta} > J_{\alpha\beta}$  with  $P < 0.005$ . Unpaired Student's t-test concludes that  $J_{\alpha\beta}/J_{\beta\beta}$  is different <sup>b</sup>between Mouse and Pig islets, <sup>c</sup>between Pig and Human1 islets, and <sup>d</sup>between Human1 and Human2 islets with  $P < 0.005$ .
